# Supplementary material for: Efficient depolymerization of lignins to alkylphenols using phosphided NiMo catalysts
Source: Royal Society of Chemistry journal article supplement (doi:10.1039/d1cy00588j), 2021-01-01

Supporting information for:

## Support effects for catalytic depolymerisation of lignin to alkylphenolics using phosphided NiMo catalyst

Received 00th January 20xx,  
Accepted 00th January 20xx

Jessi Osorio Velasco, Ilse van der Linden, Peter J. Deuss, Hero J. Heeres\*

DOI: 10.1039/x0xx00000x

Number of Pages: 17

Number of Figures: 10

Number of Tables: 5

---

Chemical Engineering Department, ENTEG, University of Groningen, Nijenborgh 4,  
9747 AG Groningen, The Netherlands  
\*h.j.heeres@rug.nl

Table S1. GC-MS identification of compounds in Kraft lignin oil with 20NiMoP/SiO<sub>2</sub> catalyst (initial hydrogen pressure of 100 bar at RT, 2 h @ 400 °C, 1200 RPM).

|                                          |                                         |
|------------------------------------------|-----------------------------------------|
| Pentane                                  | 2,3-dimethyl-phenol                     |
| Hexane                                   | 2,4-dimethyl-phenol                     |
| Cyclohexane                              | 2,6-dimethyl-phenol                     |
| 2-methyl-tetrahydrofuran                 | 3,4-dimethyl-phenol                     |
| 3-methyl-tetrahydrofuran                 | 3,5-dimethyl-phenol                     |
| Cis-1,2-dimethyl-cyclopentane            | 2-ethyl-4-methyl-phenol                 |
| Cis-1,3-dimethyl-cyclopentane            | 2-ethyl-6-methyl-phenol                 |
| Isopropyl-cyclobutane                    | 3-ethyl-5-methyl-phenol                 |
| Heptane                                  | 4-ethyl-3-methyl-phenol                 |
| Methyl-cyclohexane                       | 2-(1-methylethyl)-phenol                |
| Ethyl-cyclohexane                        | 3-(1-methylethyl)-phenol                |
| Propyl-cyclohexane                       | 2,4,6-trimethylphenol                   |
| Butyl-cyclohexane                        | 2,3,6-trimethylphenol                   |
| 1,3,5-cycloheptatriene                   | 2,5-diethyl-phenol                      |
| 1,2-dimethyl-cyclohexane                 | 3,5-diethyl-phenol                      |
| 1,3-dimethyl-cyclohexane                 | 2-(1-methylpropyl)-phenol               |
| 1,4-dimethyl-cyclohexane                 | 4-(1-methylpropyl)-phenol               |
| 1-ethyl-2-methyl-cyclohexane             | 2-allyl-4-methylphenol                  |
| 1-ethyl-3-methyl-cyclohexane             | 2-cyclopentyl-phenol                    |
| 1-ethyl-4-methyl-cyclohexane             | 4-cyclopentyl-phenol                    |
| Ethylbenzene                             | Naphthalene                             |
| Propylbenzene                            | 1-methylnaphthalene                     |
| p-xylene                                 | 2-methyl-naphthalene                    |
| o-xylene                                 | 1,4-dimethyl-naphthalene                |
| 1,3-dimethyl-benzene                     | 2,3-dimethyl-naphthalene                |
| 1-ethyl-3-methyl-benzene                 | 2,7-dimethyl-naphthalene                |
| 1-methyl-2-propyl-benzene                | 1,2,3,4-tetrahydro-naphthalene          |
| 1-methyl-4-propyl-benzene                | 1,2,3,4-tetrahydro-5-methyl-naphthalene |
| 1-methyl-1-butenyl-benzene               | 1,2,3,4-tetrahydro-6-methyl-naphthalene |
| 1-methyl-2-(1-methyl-2-propenyl)-benzene | Azulene                                 |
| cis-octahydro-1H-indene                  | Cyclopentylcyclohexane                  |
| 2,3-dihydro-1,6-dimethyl-1H-indene       | 6-methyl-4-indanol                      |
| Phenol                                   | 2,3-dihydro-1H-inden-5-ol               |
| 2-methyl-phenol                          | 9-methylene-9h-fluorene                 |
| 3-methyl-phenol                          | Anthracene                              |
| 4-methyl-phenol                          | 9-methyl-anthracene                     |

|                 |                                           |
|-----------------|-------------------------------------------|
| 2-ethyl-phenol  | Phenanthrene                              |
| 3-ethyl-phenol  | 1-methyl-7-(1-methylethyl)-phenanthracene |
| 4-ethyl-phenol  | 2-isopropyl-10-methylphenanthrene         |
| 2-propyl-phenol |                                           |

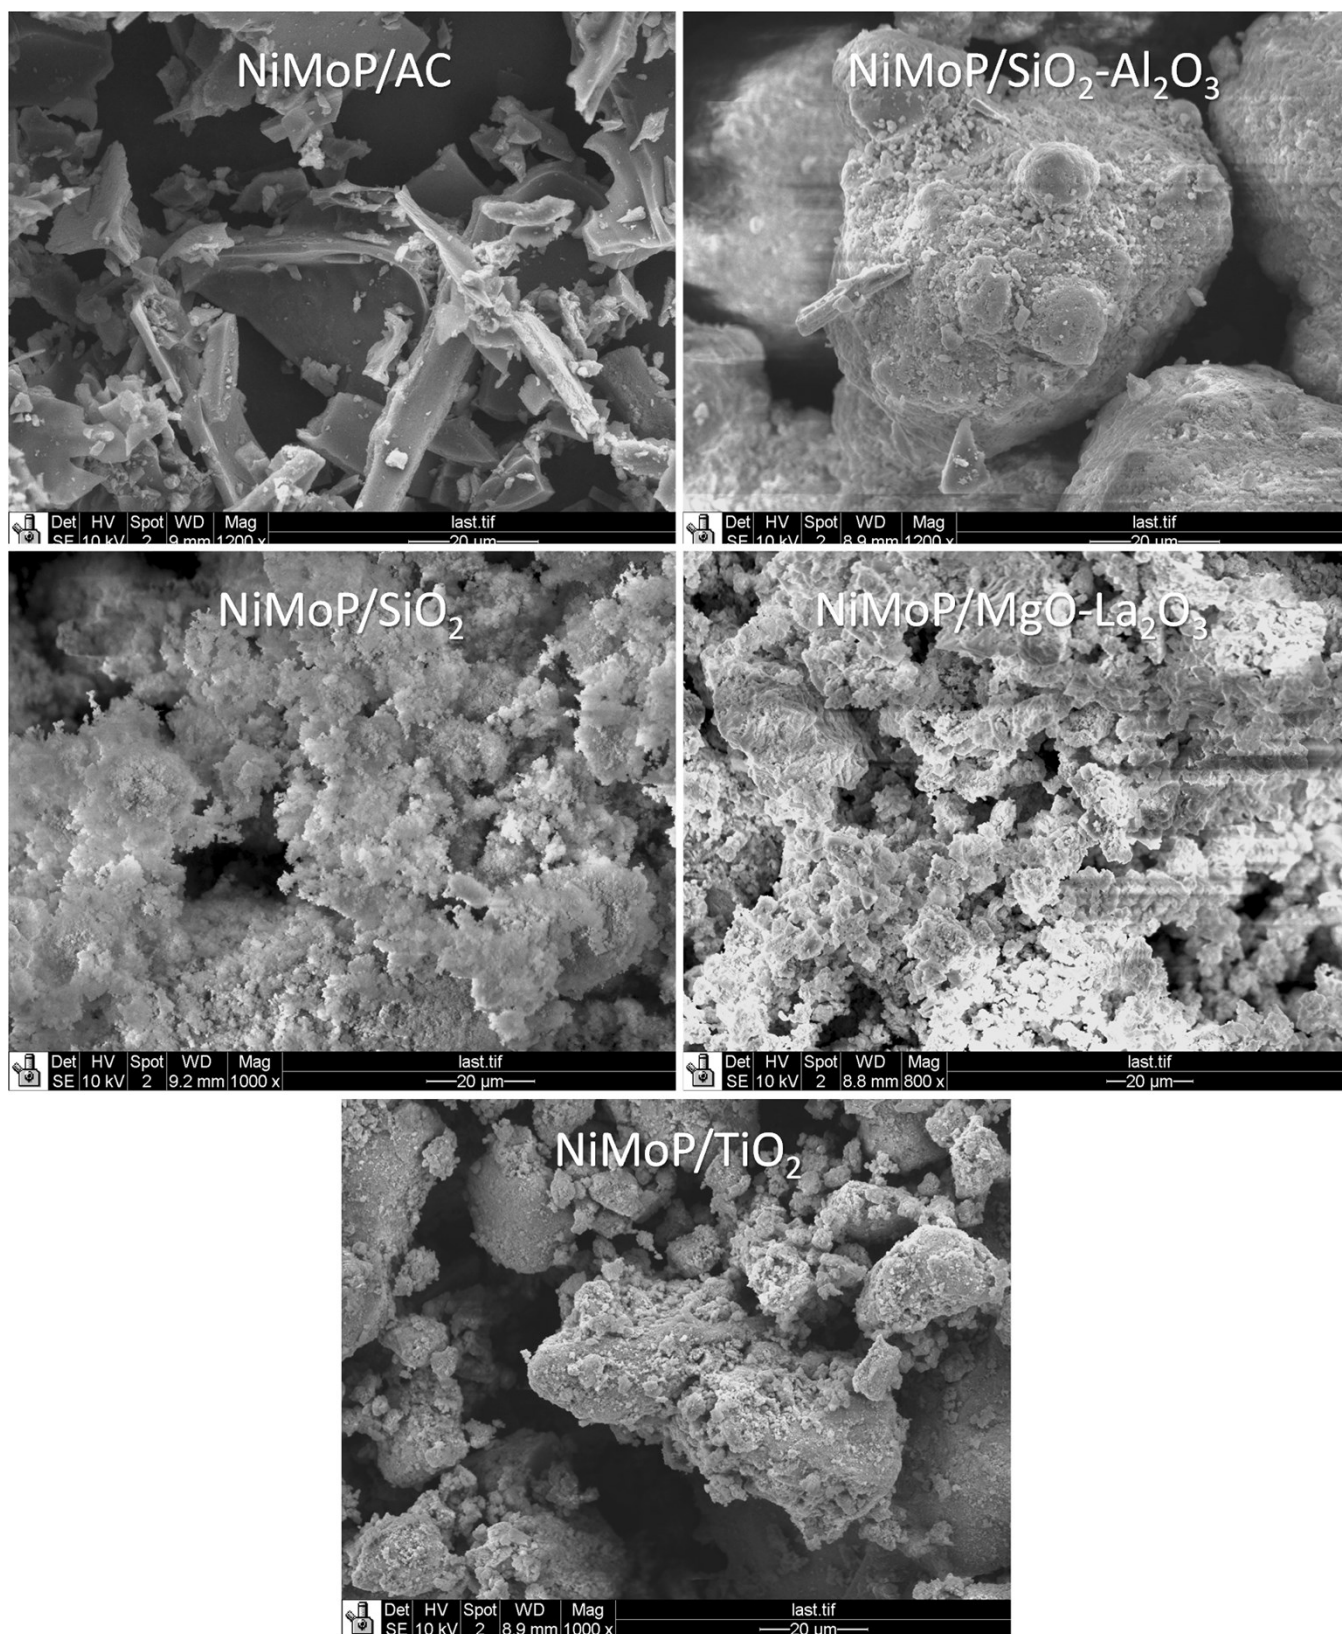

Figure S1. SEM images of the catalysts

Figure S2. Chemisorption data for the fresh catalysts using  $\text{NH}_3$  (alle catalysts except  $\text{NiMoP-MgO-La}_2\text{O}_3$ ) and  $\text{CO}_2$  ( $\text{NiMoP-MgO-La}_2\text{O}_3$ ) \*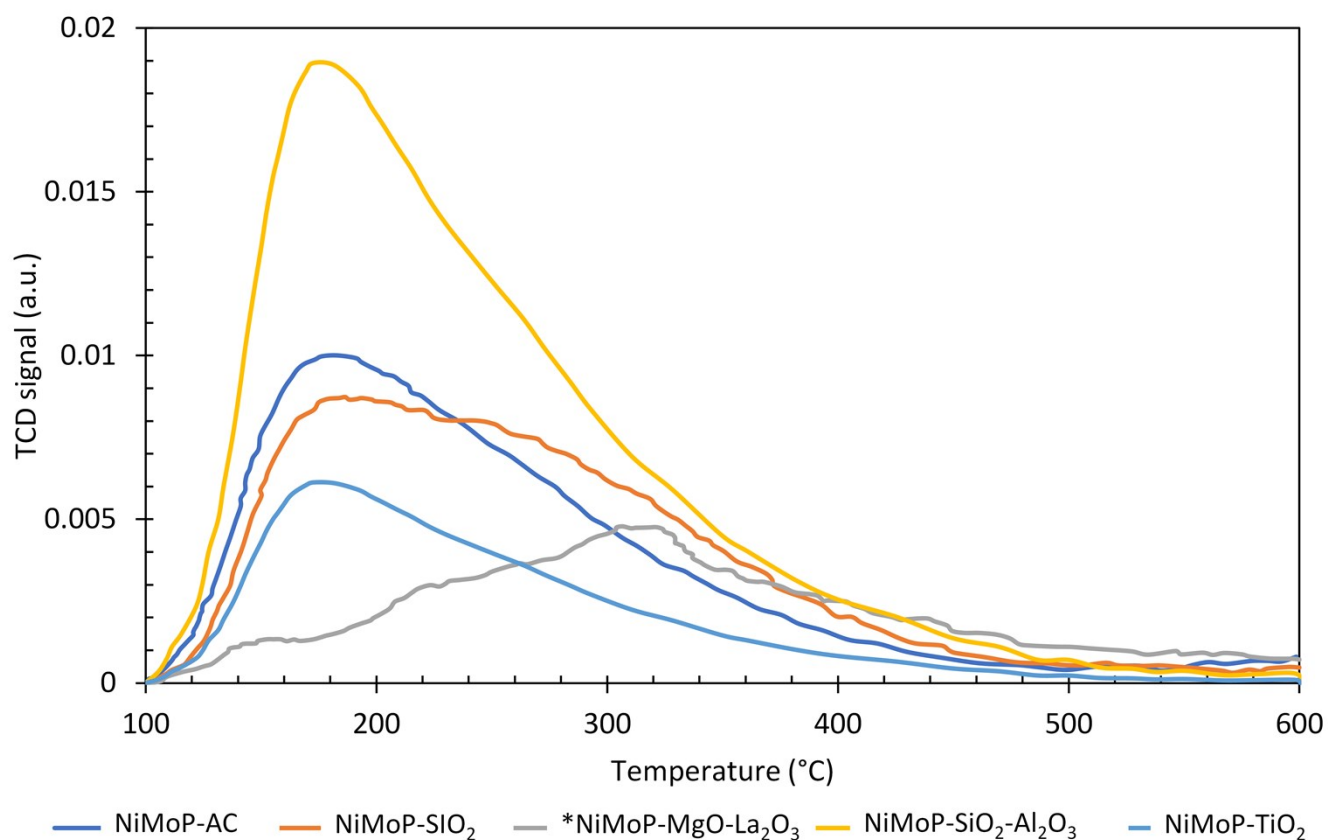

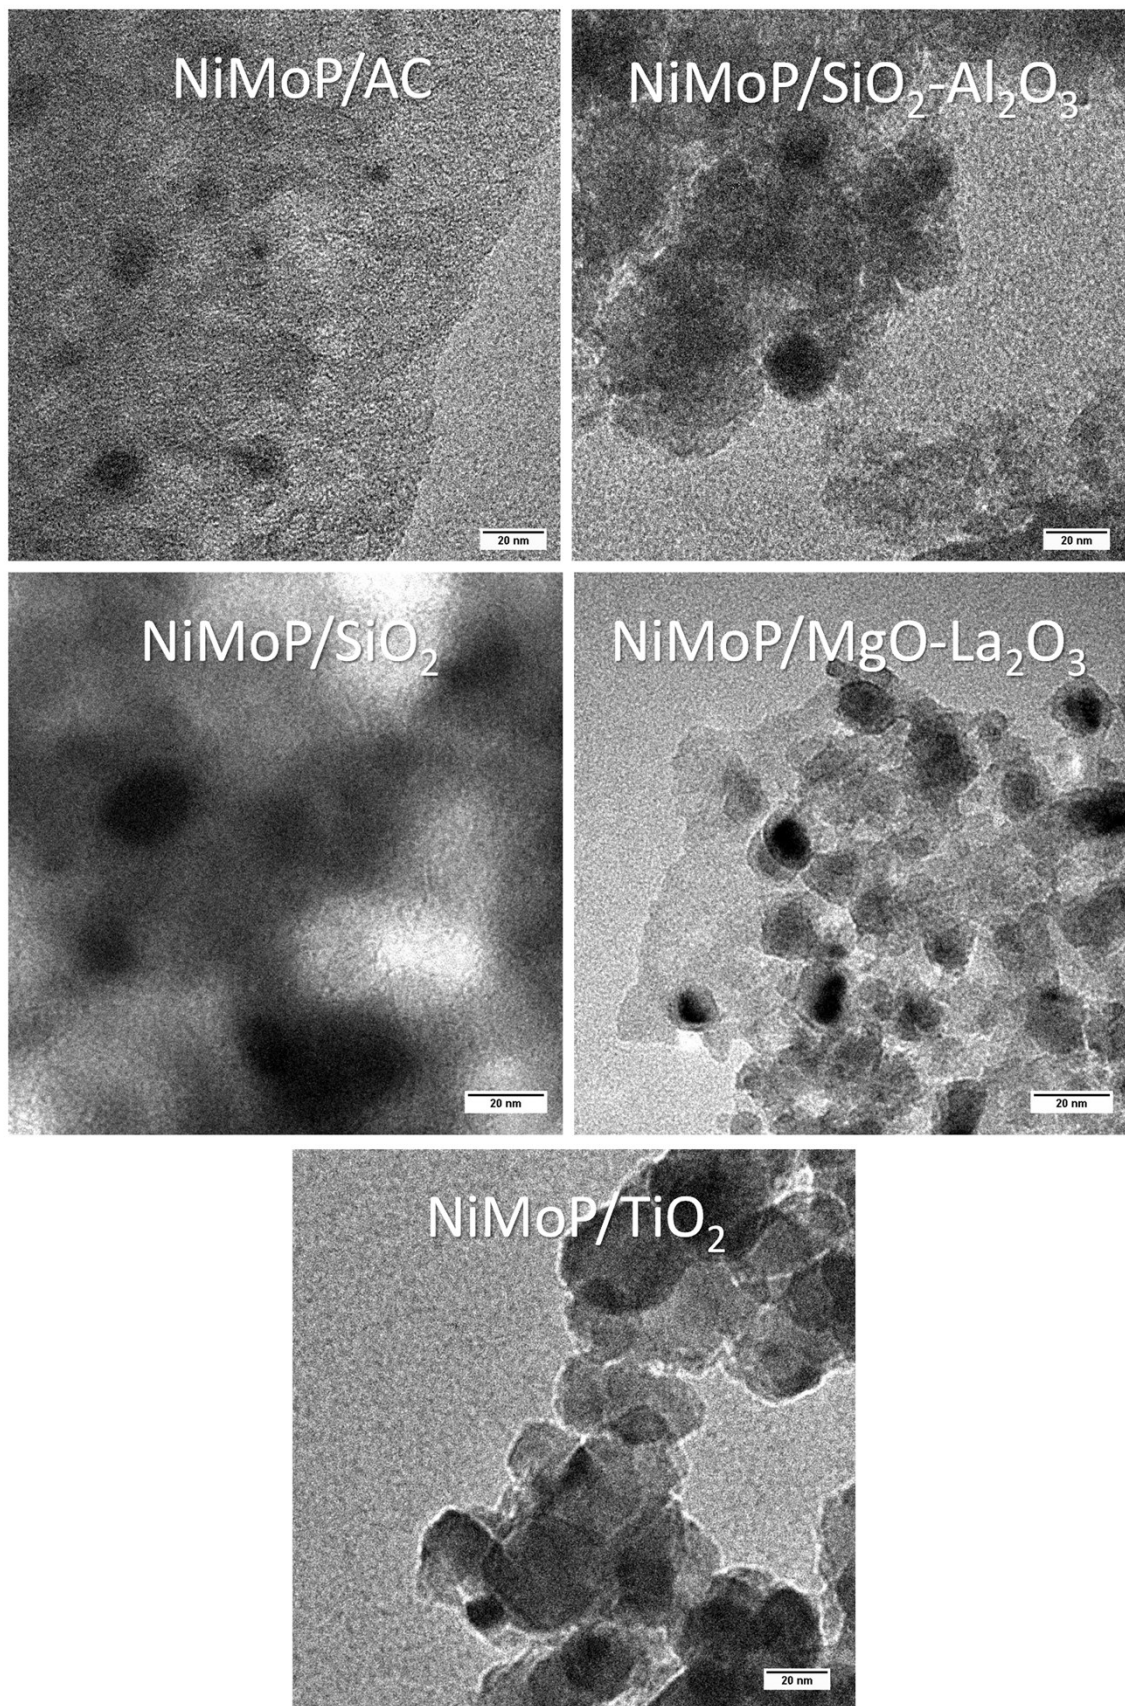

Figure S3. TEM images of fresh catalysts



Table S2. Overview of experiments with Kraft lignin

| Batch # | Catalyst support                                 | Gasphase (%) | Mass balance (%) | Oil yield (%) | Solids (%) | Water (%) | Alkylphenolics (%) | Aromatics (%) | Total monomer (%) | Cyclic + Linear alkanes (%) |
|---------|--------------------------------------------------|--------------|------------------|---------------|------------|-----------|--------------------|---------------|-------------------|-----------------------------|
| 4       | AC                                               | 8.3          | 81.5             | 52.0          | 2.3        | 18.8      | 24.9               | 3.9           | 37.4              | 4.3                         |
| 5       | TiO <sub>2</sub>                                 | 7.8          | 83.0             | 56.5          | 1.1        | 17.7      | 24.0               | 4.1           | 38.1              | 5.3                         |
| 6       | TiO <sub>2</sub>                                 | 16.3         | 96.9             | 61.1          | 2.2        | 17.3      | 26.6               | 4.7           | 43.0              | 6.6                         |
| 7       | AC                                               | 8.3          | 94.9             | 61.6          | 2.6        | 22.4      | 31.4               | 4.8           | 48.5              | 5.6                         |
| 8       | SiO <sub>2</sub> -Al <sub>2</sub> O <sub>3</sub> | 9.9          | 91.2             | 58.7          | 6.2        | 16.4      | 20.6               | 3.3           | 33.1              | 5.3                         |
| 11      | SiO <sub>2</sub>                                 | 9.6          | 87.6             | 67.4          | 1.7        | 8.9       | 32.5               | 5.9           | 54.7              | 8.1                         |
| 13      | SiO <sub>2</sub> -Al <sub>2</sub> O <sub>3</sub> | 11.3         | 94.4             | 65.5          | 3.2        | 14.4      | 17.6               | 3.3           | 29.4              | 5.3                         |
| 14      | SiO <sub>2</sub>                                 | 9.9          | 93.4             | 68.8          | 2.4        | 12.3      | 28.7               | 5.5           | 48.8              | 8.1                         |
| 15      | MgO-La <sub>2</sub> O <sub>3</sub>               | 10.0         | 93.7             | 57.5          | 13.9       | 12.4      | 21.7               | 4.1           | 36.1              | 5.7                         |
| 16      | MgO-La <sub>2</sub> O <sub>3</sub>               | 9.8          | 90.8             | 51.4          | 15.8       | 13.8      | 19.6               | 4.1           | 33.1              | 5.1                         |

<sup>a)</sup> Reaction conditions: 15 g Kraft lignin, 1.5 g catalyst, initial hydrogen pressure of 100 bar at RT, 2 h @ 400 °C, 1200 RPM.

<sup>b)</sup> Percentages are in wt% on lignin intake.



Table S3 Overview of the gas phase composition of all batch reactions

| Batch # | Catalyst support                                 | Lignin type | CO <sub>2</sub> (mol%) | Ethylene (mol%) | Ethane (mol%) | Propylene (mol%) | Propane (mol%) | H <sub>2</sub> (mol%) | CH <sub>4</sub> (mol%) | CO (mol%) |
|---------|--------------------------------------------------|-------------|------------------------|-----------------|---------------|------------------|----------------|-----------------------|------------------------|-----------|
| 4       | AC                                               | Kraft       | 7.6                    | 0.0             | 1.9           | 0.0              | 1.0            | 58.2                  | 31.1                   | 0.1       |
| 5       | TiO <sub>2</sub>                                 | Kraft       | 8.5                    | 0.0             | 2.2           | 0.0              | 1.0            | 70.3                  | 17.8                   | 0.2       |
| 6       | TiO <sub>2</sub>                                 | Kraft       | 15.0                   | 0.0             | 4.1           | 0.0              | 2.2            | 29.4                  | 48.9                   | 0.4       |
| 7       | AC                                               | Kraft       | 7.5                    | 0.0             | 1.9           | 0.0              | 1.1            | 56.7                  | 32.8                   | 0.1       |
| 8       | SiO <sub>2</sub> -Al <sub>2</sub> O <sub>3</sub> | Kraft       | 8.2                    | 0.0             | 2.2           | 0.0              | 1.0            | 60.8                  | 27.5                   | 0.3       |
| 11      | SiO <sub>2</sub>                                 | Kraft       | 8.3                    | 0.0             | 2.5           | 0.0              | 1.1            | 50.4                  | 37.7                   | 0.1       |
| 13      | SiO <sub>2</sub> -Al <sub>2</sub> O <sub>3</sub> | Kraft       | 9.5                    | 0.0             | 2.4           | 0.0              | 1.1            | 57.8                  | 28.9                   | 0.4       |
| 14      | SiO <sub>2</sub>                                 | Kraft       | 8.1                    | 0.0             | 2.0           | 0.0              | 1.0            | 54.8                  | 33.9                   | 0.1       |
| 15      | MgO-La <sub>2</sub> O <sub>3</sub>               | Kraft       | 8.1                    | 0.0             | 2.6           | 0.0              | 1.2            | 61.7                  | 26.2                   | 0.3       |
| 16      | MgO-La <sub>2</sub> O <sub>3</sub>               | Kraft       | 7.4                    | 0.0             | 2.6           | 0.0              | 1.2            | 62.7                  | 25.8                   | 0.3       |
| 17      | SiO <sub>2</sub>                                 | Lignoboost  | 8.0                    | 0.0             | 1.5           | 0.0              | 0.8            | 51.6                  | 38.0                   | 0.1       |
| 18      | SiO <sub>2</sub>                                 | Lignoboost  | 9.4                    | 0.0             | 2.0           | 0.0              | 1.0            | 63.1                  | 24.3                   | 0.2       |
| 20      | SiO <sub>2</sub>                                 | Alcell      | 10.7                   | 0.0             | 5.5           | 0.1              | 1.6            | 42.8                  | 38.6                   | 0.7       |
| 21      | SiO <sub>2</sub>                                 | Alcell      | 10.8                   | 0.1             | 4.8           | 0.1              | 1.6            | 44.1                  | 38.0                   | 0.6       |

a) As determined by GC-TCD.

b) Reaction conditions: 15 g lignin, 1.5 g catalyst, initial hydrogen pressure of 100 bar at RT, 2 h @ 400 °C, 1200 RPM.

Table S4. Elemental analysis for lignin oil for all batch reactions

| Batch # | Catalyst support                                 | Lignin     | C (%) | H (%) | N (%) | S (%) |
|---------|--------------------------------------------------|------------|-------|-------|-------|-------|
| 4       | AC                                               | Kraft      | 82.52 | 7.65  | 0.90  | 0.30  |
| 7       | AC                                               | Kraft      | 82.48 | 7.79  | 0.87  | 0.20  |
| 5       | TiO <sub>2</sub>                                 | Kraft      | 83.89 | 7.74  | 0.85  | 0.30  |
| 6       | TiO <sub>2</sub>                                 | Kraft      | 83.64 | 7.69  | 0.87  | 0.14  |
| 8       | SiO <sub>2</sub> -Al <sub>2</sub> O <sub>3</sub> | Kraft      | 81.96 | 7.22  | 0.89  | 0.22  |
| 13      | SiO <sub>2</sub> -Al <sub>2</sub> O <sub>3</sub> | Kraft      | 72.66 | 6.49  | 0.90  | 0.80  |
| 15      | MgO-La <sub>2</sub> O <sub>3</sub>               | Kraft      | 75.19 | 7.45  | 0.84  | 0.43  |
| 16      | MgO-La <sub>2</sub> O <sub>3</sub>               | Kraft      | 74.97 | 7.76  | 0.79  | 0.42  |
| 14      | SiO <sub>2</sub>                                 | Kraft      | 83.54 | 7.58  | 0.95  | 0.25  |
| 11      | SiO <sub>2</sub>                                 | Kraft      | 83.45 | 7.82  | 0.93  | 0.16  |
| 17      | SiO <sub>2</sub>                                 | Lignoboost | 83.20 | 7.70  | 0.00  | 0.12  |
| 18      | SiO <sub>2</sub>                                 | Lignoboost | 83.52 | 7.57  | 0.00  | 0.12  |
| 20      | SiO <sub>2</sub>                                 | Alcell     | 75.35 | 7.32  | 0.09  | 0.05  |
| 21      | SiO <sub>2</sub>                                 | Alcell     | 75.41 | 7.24  | 0.08  | 0.05  |

Table S5. Elemental analysis for solid residues for all batch reactions

| Batch # | Catalyst support                                 | Lignin     | C      | H     | N     | S    |
|---------|--------------------------------------------------|------------|--------|-------|-------|------|
| 4       | AC                                               | Kraft      | 70.78  | 2.06  | 0.81  | 5.86 |
| 7       | AC                                               | Kraft      | 73.26  | 2.09  | 0.80  | 6.29 |
| 5       | TiO <sub>2</sub>                                 | Kraft      | 6.39   | 0.66  | 0.27  | 5.98 |
| 6       | TiO <sub>2</sub>                                 | Kraft      | 6.30   | 0.62  | 0.23  | 6.01 |
| 8       | SiO <sub>2</sub> -Al <sub>2</sub> O <sub>3</sub> | Kraft      | 25.48  | 1.82  | 0.81  | 4.67 |
| 13      | SiO <sub>2</sub> -Al <sub>2</sub> O <sub>3</sub> | Kraft      | 14.55  | 1.5   | 0.655 | 5.19 |
| 15      | MgO-La <sub>2</sub> O <sub>3</sub>               | Kraft      | 35.465 | 2.53  | 0.65  | 4.21 |
| 16      | MgO-La <sub>2</sub> O <sub>3</sub>               | Kraft      | 40.91  | 2.835 | 0.75  | 3.93 |
| 14      | SiO <sub>2</sub>                                 | Kraft      | 5.625  | 0.835 | 0.36  | 6.06 |
| 11      | SiO <sub>2</sub>                                 | Kraft      | 6.96   | 0.68  | 0.32  | 6.30 |
| 17      | SiO <sub>2</sub>                                 | Lignoboost | 4.455  | 0.885 | 0.065 | 7.08 |
| 18      | SiO <sub>2</sub>                                 | Lignoboost | 4.46   | 0.875 | 0.06  | 6.46 |
| 20      | SiO <sub>2</sub>                                 | Alcell     | 13.265 | 1.385 | 0.17  | 0.44 |
| 21      | SiO <sub>2</sub>                                 | Alcell     | 20.59  | 1.73  | 0.21  | 0.28 |

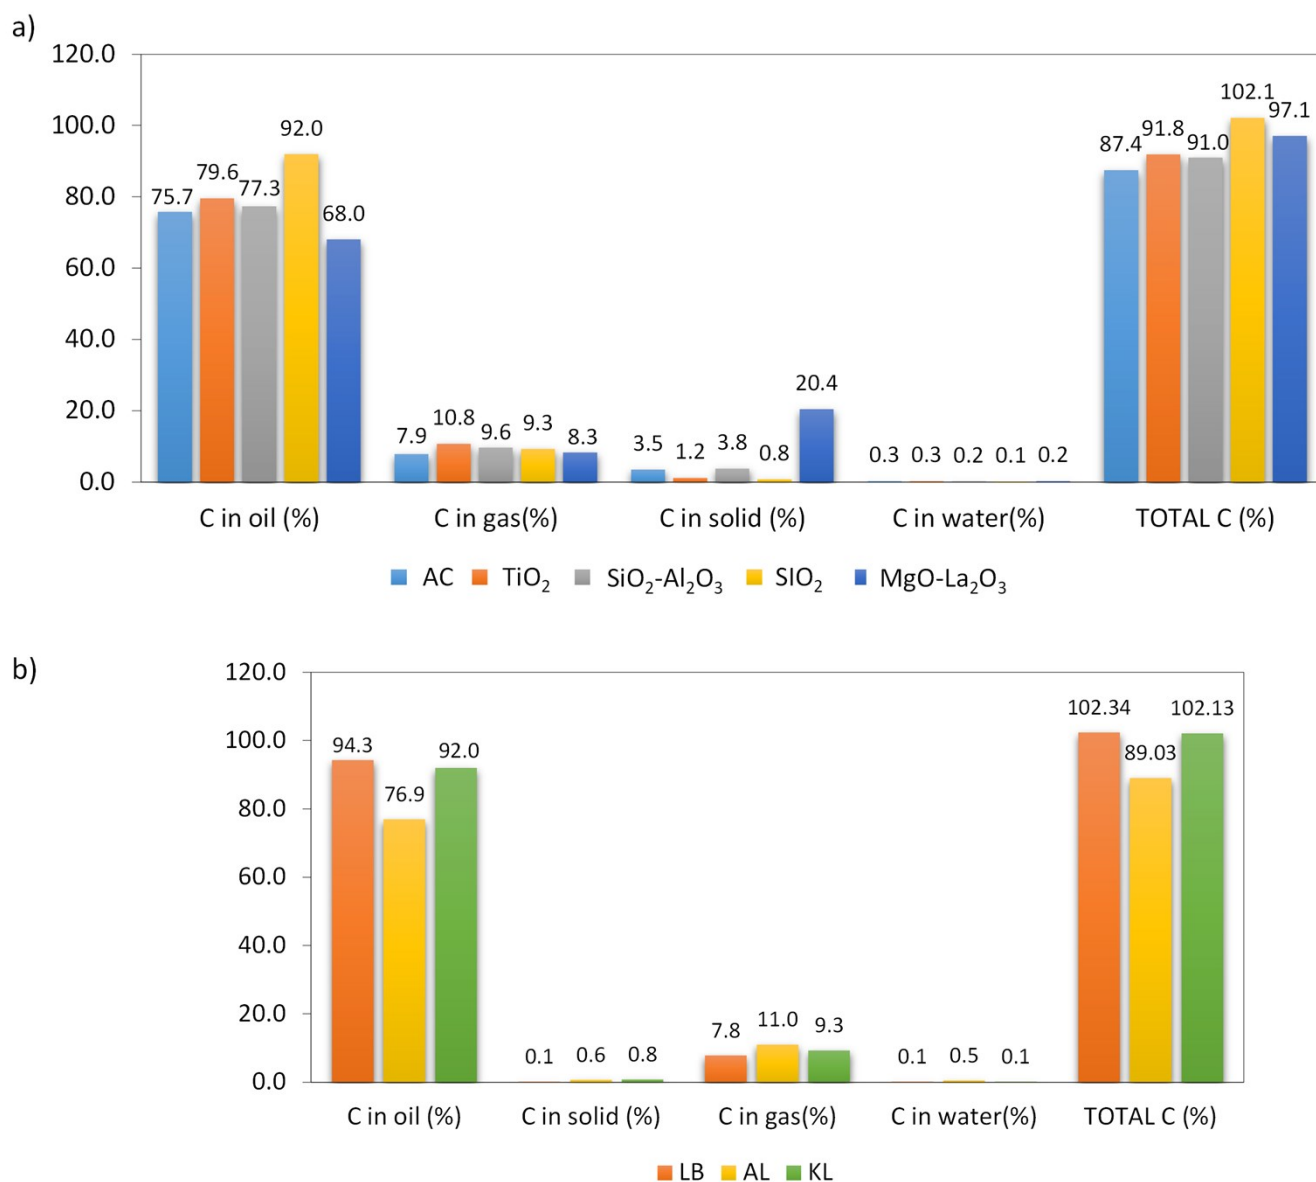

Figure S4. Carbon balance for a) hydrotreatment on different supports and b) hydrotreatment for some technical lignins

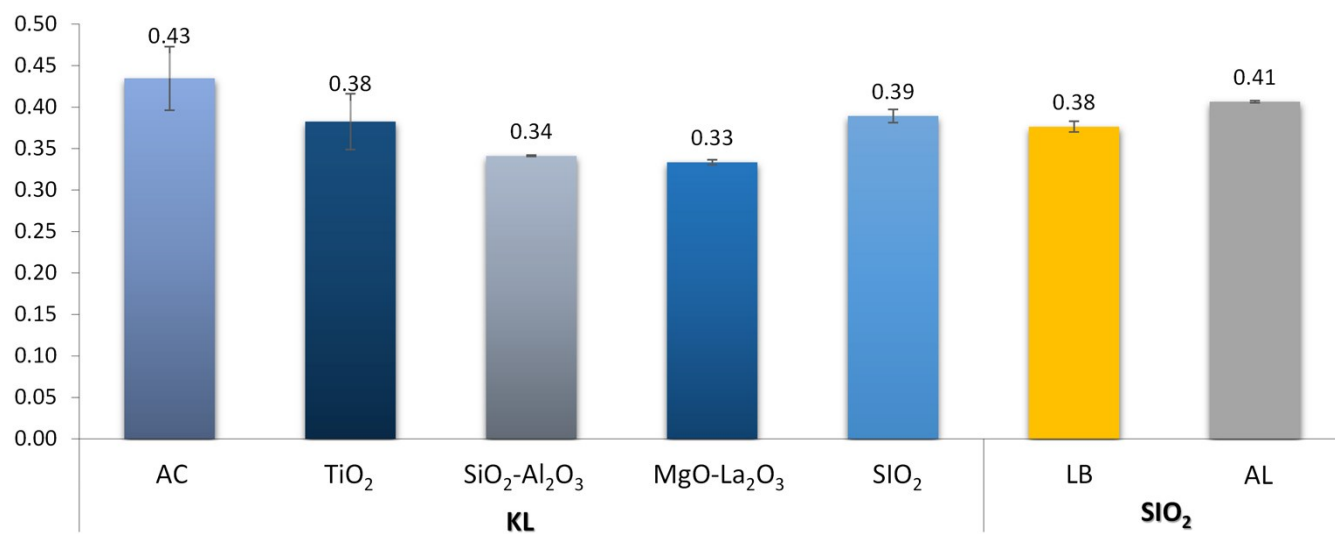

Figure S5. Hydrogen consumption in NL/g of lignin during hydrotreatment of Kraft lignin with NiMoP on various supports and different lignins on NiMoP/SiO<sub>2</sub>

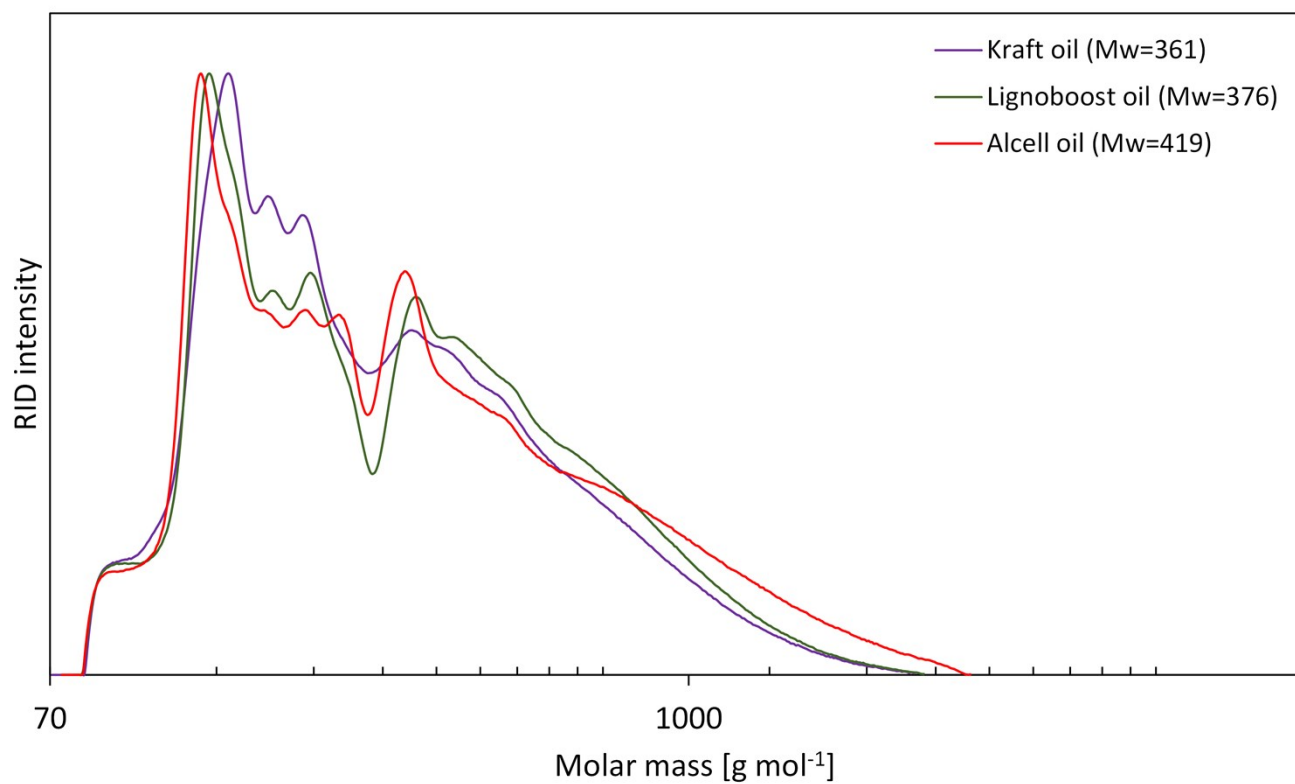

Figure S6. GPC chromatogram of the three lignin oils obtained from the hydrotreatment of them using NiMoP/SiO<sub>2</sub> (Measured in THF, see Table 1)

Figure S7. X-ray diffractograms of the supported NiMoP catalysts.

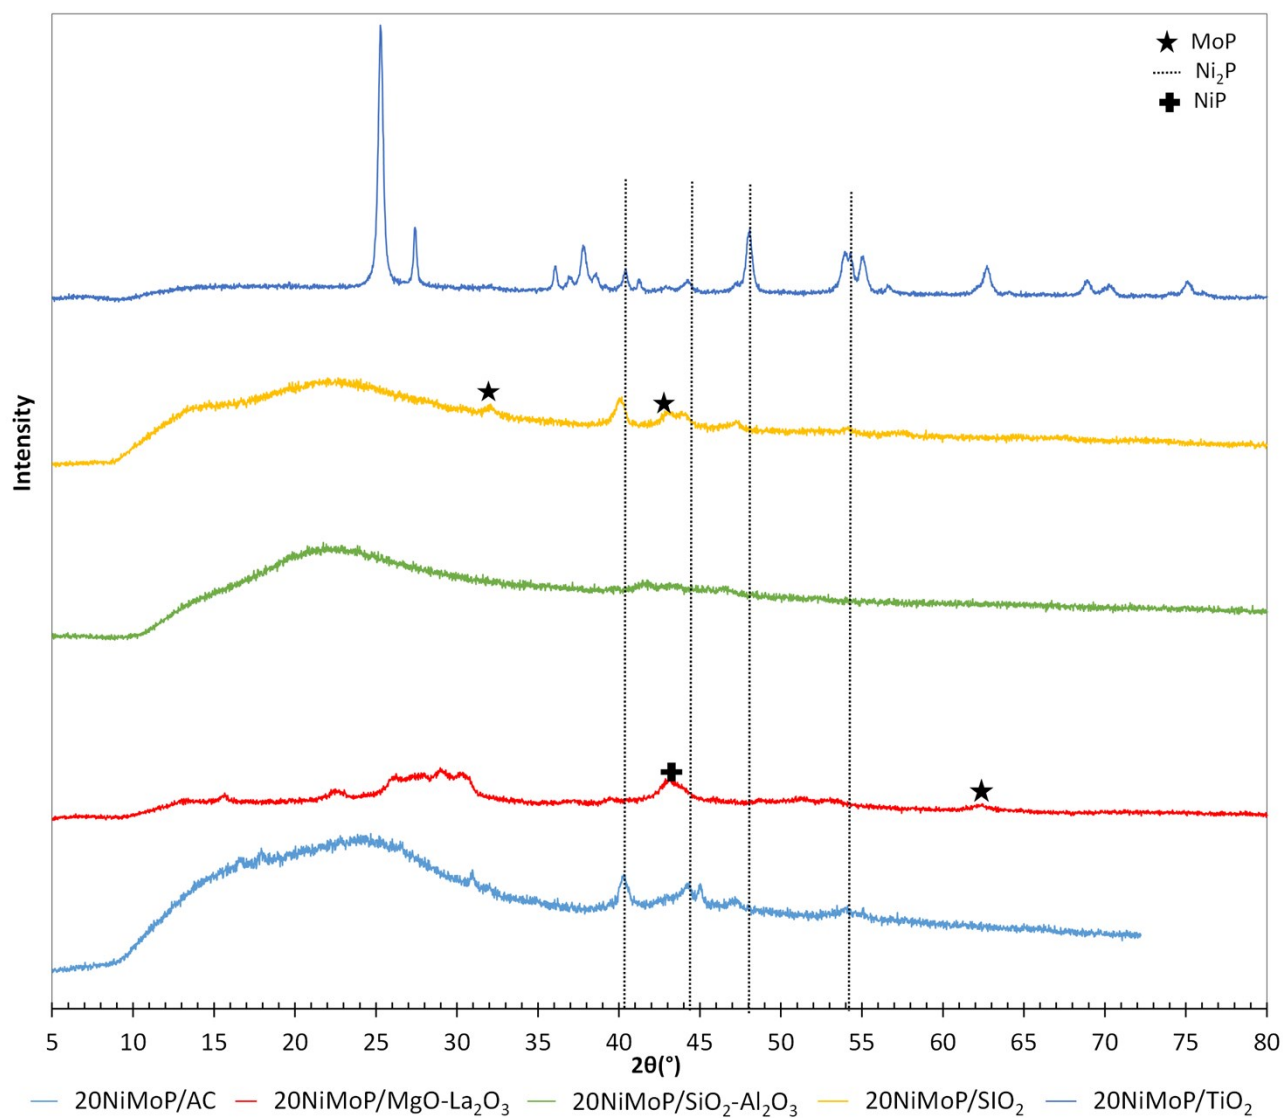

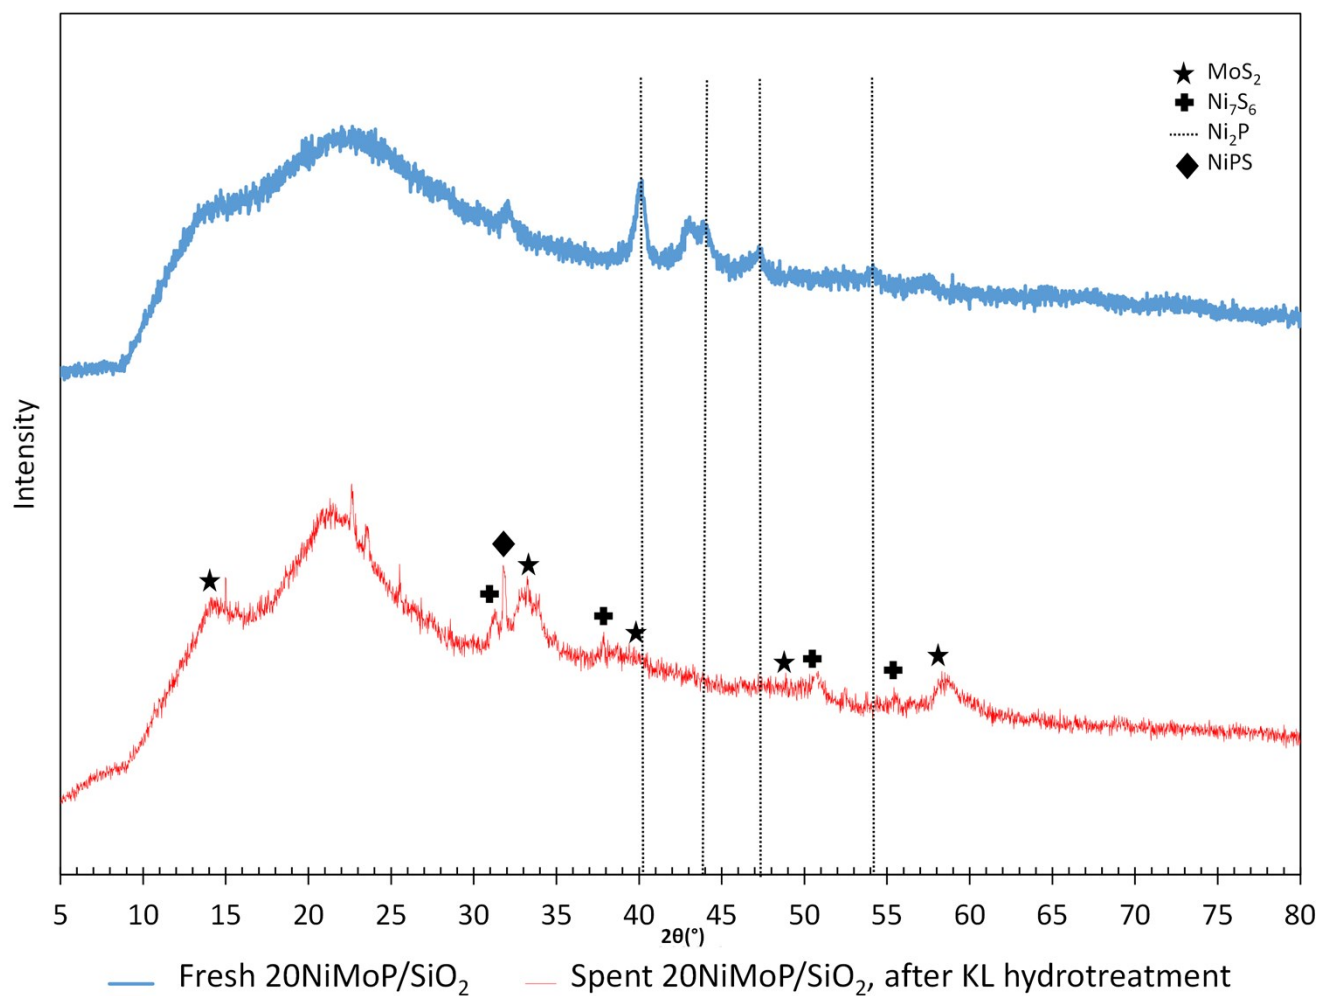

Figure S8. X-ray diffractograms of fresh and spent NiMoP/SiO<sub>2</sub> catalyst for the hydrotreatment of Kraft lignin.



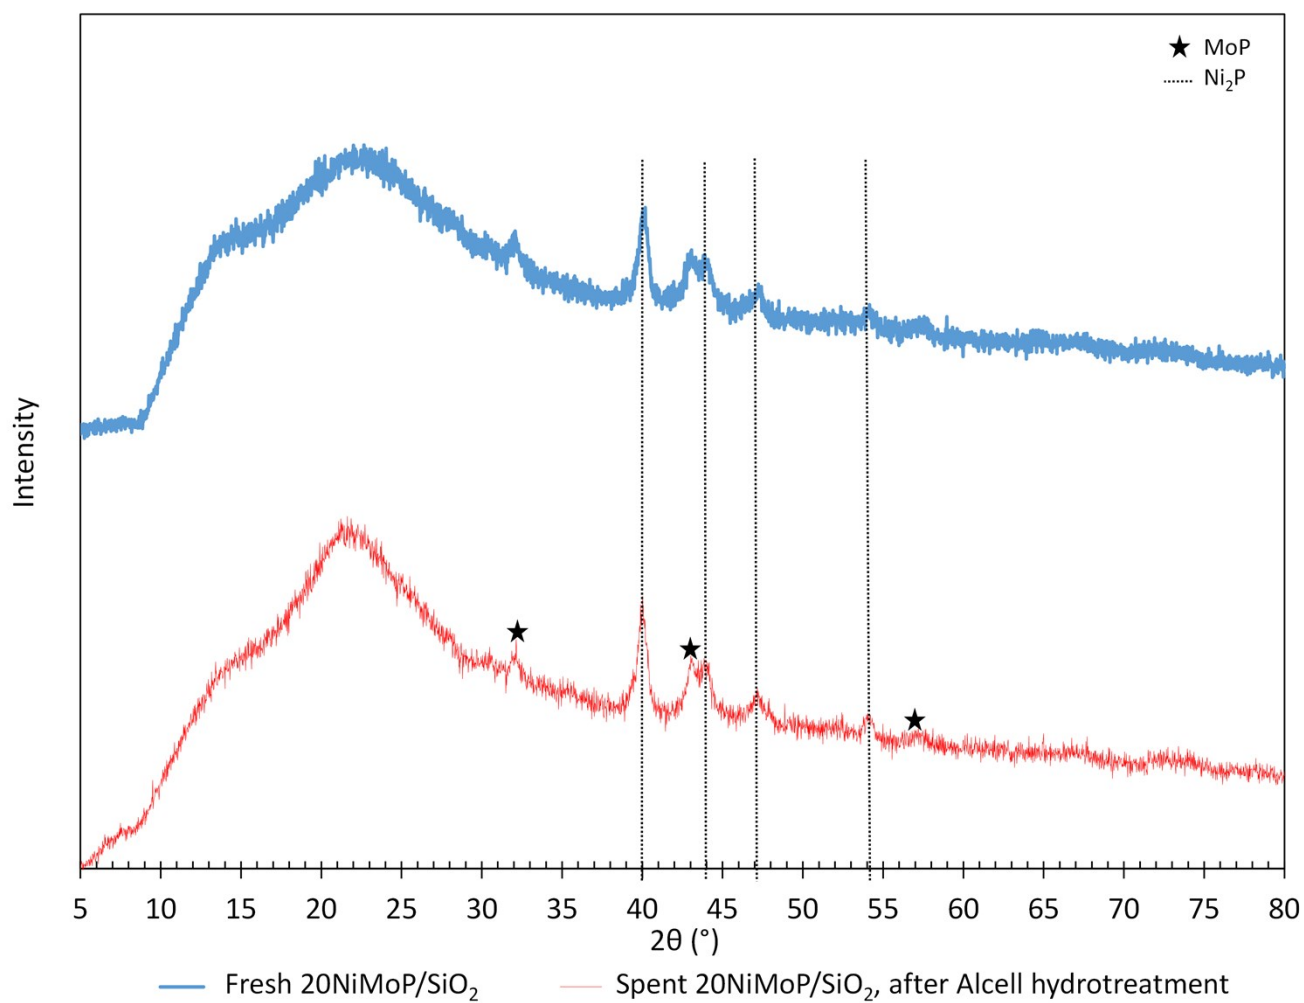

Figure S9. X-ray diffractograms of fresh and spent NiMoP/SiO<sub>2</sub> catalyst for the hydrotreatment of Alcell lignin

Figure S10. Literature comparison of relevant data for the hydrotreatment of Kraft lignin.

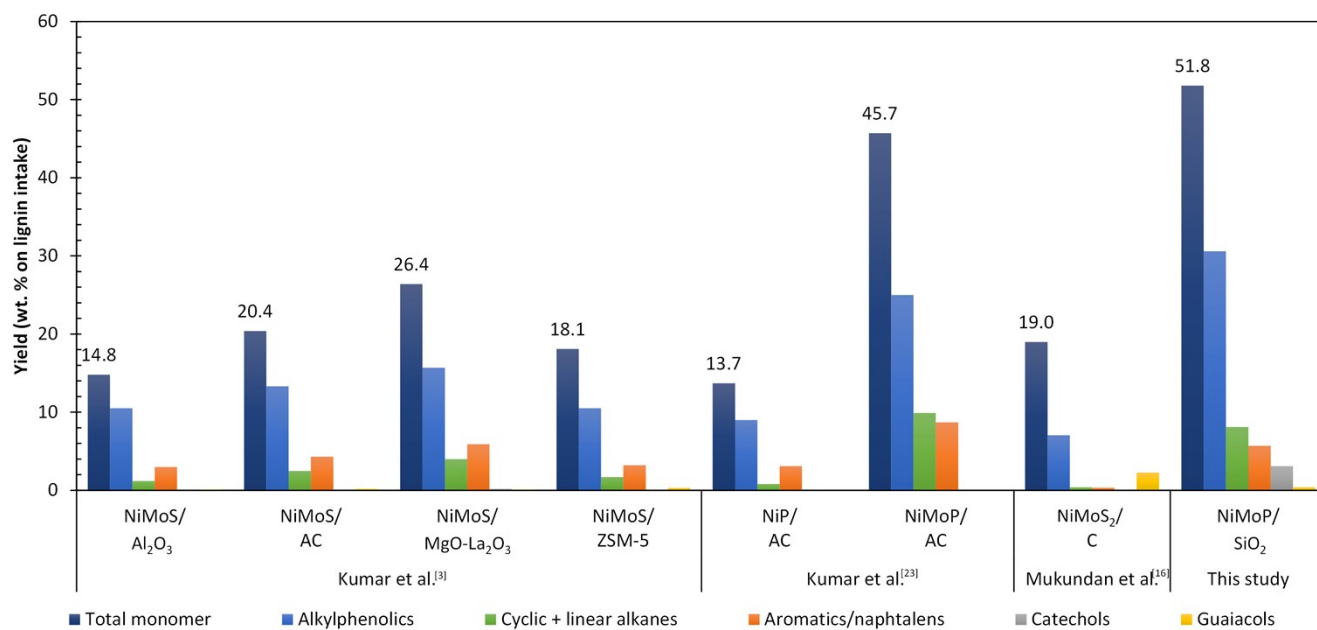

Supplement: d1cy00588j1.pdf [file d1cy00588j1.pdf]
